# Supplementary material for: Long non-coding RNA UCA1 enhances cervical cancer cell proliferation and invasion by regulating microRNA-299-3p expression
Source: PubMed Central journal article supplement — Oncol Lett. 2021 Sep 9;22(5):772. doi: 10.3892/ol.2021.13033 (PMC8442166; doi:10.3892/ol.2021.13033), 2021-09-09
Supplement: Supplementary_Data.pdf [file Supplementary_Data.pdf]

Table SI. Clinical characteristics of patients with cervical cancer (n=30).

| Characteristic        | Number of patients, n (%) |
|-----------------------|---------------------------|
| Age, years            |                           |
| ≥50                   | 21 (70.0)                 |
| <50                   | 9 (30.0)                  |
| FIGO                  |                           |
| I                     | 7 (23.3)                  |
| II                    | 18 (60.0)                 |
| III                   | 3 (10.0)                  |
| IV                    | 2 (0.7)                   |
| Tumor size, cm        |                           |
| ≥4                    | 11 (36.7)                 |
| <4                    | 19 (63.3)                 |
| Histological type     |                           |
| Squamous carcinoma    | 18 (60.0)                 |
| Adenocarcinoma        | 8 (26.7)                  |
| Other                 | 4 (13.3)                  |
| Tumor differentiation |                           |
| Well                  | 6 (20.0)                  |
| Moderate              | 9 (30.0)                  |
| Poor                  | 15 (50.0)                 |
| Vascular invasion     |                           |
| Negative              | 16 (53.3)                 |
| Positive              | 14 (46.7)                 |
| Lymph node metastasis |                           |
| Negative              | 19 (63.3)                 |
| Positive              | 11 (36.7)                 |

FIGO, International Federation of Gynecology and Obstetrics criteria.
